# Supplementary material
Source: HighWire-hosted journal article supplement (https://diabetes.diabetesjournals.org/content/suppl/2006/12/08/55.12.3351)
Supplement: OnlineTable1DB000715.pdf [file OnlineTable1DB000715.pdf]

TABLE 1

Frequency and age at onset of diabetes in DR.*lyp/lyp* and DRF BB rats

|                             | DR. <i>lyp/lyp</i> | DRF. <i>b/b</i> | DRF. <i>b/f</i> | DRF. <i>f/f</i> |
|-----------------------------|--------------------|-----------------|-----------------|-----------------|
| <i>n</i>                    | 101                | 93              | 163             | 85              |
| Diabetes frequency          | 101 (100)          | 93 (100)        | 102 (63)        | 0 (0)           |
| Average age at onset (days) | 61                 | 68              | 88              | NA              |
| Range                       | 46–81              | 50–143          | 52–222          | NA              |

Data are *n* (%) unless otherwise indicated.
