# Supplementary material
Source: HighWire-hosted journal article supplement (https://diabetes.diabetesjournals.org/content/suppl/2006/12/08/55.12.3351)
Supplement: OnlineTable2DB000715.pdf [file OnlineTable2DB000715.pdf]

TABLE 2

Insulinitis and thyroiditis in DRF.*b/f* and *f/f* rats

| Score | Insulinitis     |                 | Thyroiditis     |                 |
|-------|-----------------|-----------------|-----------------|-----------------|
|       | DRF. <i>b/f</i> | DRF. <i>f/f</i> | DRF. <i>b/f</i> | DRF. <i>f/f</i> |
| +0    | 24 (73)         | 59 (92)         | 2 (13)          | 13 (25)         |
| +1    | 8 (24)          | 3 (5)           | 4 (17)          | 13 (25)         |
| +2    | 3 (1)           | 2 (3)           | 12 (50)         | 19 (37)         |
| +3    | 0 (0)           | 0 (0)           | 5 (21)          | 7 (13)          |
| +4    | 0 (0)           | 0 (0)           | 0 (0)           | 0 (0)           |

Data are *n* (%) of rats. All rats were killed at >130 days. DRF.*b/f* rats developing diabetes are not shown.
